# Supplementary material
Source: Springer Nature journal article supplement (https://www.springermedizin.de/resource/supplementary/13023_2011_319_MOESM7_ESM.pdf/9642088)
Supplement: MOESM7 [file 9642088]

|                                                                                                         | Cases <sup>b</sup> | Controls <sup>c</sup> | OR [95% CI] <sup>d</sup>         |
|---------------------------------------------------------------------------------------------------------|--------------------|-----------------------|----------------------------------|
| <b>All patients (424<sup>a</sup>) versus All controls (1870<sup>a</sup>)</b>                            | 0.24 (207)         | 0.15 (549)            | 2.84 [2.03; 3.98] <sup>e</sup>   |
| <b>All patients exposed to allopurinol (57<sup>a</sup>) versus All controls (1870<sup>a</sup>)</b>      | 0.46 (52)          | 0.15 (549)            | 4.04 [2.74; 5.97] <sup>e</sup>   |
| <b>French patients (4<sup>a</sup>) exposed to allopurinol versus French Controls (1218<sup>a</sup>)</b> | 0.75 (6)           | 0.14 (360)            | 17.30 [3.48; 86.05] <sup>f</sup> |
| <b>German patients (43<sup>a</sup>) exposed to allopurinol versus German Controls(652<sup>a</sup>)</b>  | 0.41 (35)          | 0.15 (189)            | 4.05 [2.56; 6.39] <sup>f</sup>   |

**Supplementary Table 1** Association at the top SNP rs9469003 depending on the country of origin and the drug.

<sup>a</sup> Number of individuals genotyped at the marker

<sup>b</sup> Frequency of the C allele in cases (number of alleles)

<sup>c</sup> Frequency of the C allele in controls (number of alleles)

<sup>d</sup> Odds-Ratio under a multiplicative model

<sup>e</sup> These ORs were adjusted on the first two PCs to account for population stratification

<sup>f</sup> Woolf's test of heterogeneity between these two OR (France and Germany) is not significant (chi-square (1df)=2.91, p-value=0.088)

|                                                                      | Cases <sup>a</sup> | Controls <sup>b</sup> | OR [95% CI] <sup>c</sup> |
|----------------------------------------------------------------------|--------------------|-----------------------|--------------------------|
| <b>All patients versus All controls</b>                              | 9.45               | 4.01                  | 2.84 [2.03; 3.98]        |
| <b>All patients exposed to allopurinol versus All controls</b>       | 24.16              | 4.01                  | 7.77 [4.66; 12.98]       |
| <b>French patients exposed to allopurinol versus French Controls</b> | 33.83              | 4.15                  | 11.23 [1.23; 107.00]     |
| <b>German patients exposed to allopurinol versus German Controls</b> | 11.11              | 3.61                  | 9.32 [4.24; 20.50]       |

**Supplementary Table 2** Association with the CACGAC haplotype depending on the country of origin.

<sup>a</sup> Frequency (%) of the haplotype in cases

<sup>b</sup> Frequency (%) of the haplotype in controls

<sup>c</sup> Odds-Ratio associated to the CACGAC haplotype when the reference haplotype is CATGAC
